# Supplementary material for: DNA damage-induced cytotoxicity is mediated by the cooperative interaction of phospho-NF-κB p50 and a single nucleotide in the κB-site
Source: PubMed Central journal article supplement — Nucleic Acids Res. 2012 Nov 23;41(2):764–74. doi: 10.1093/nar/gks1120 (PMC3553961; doi:10.1093/nar/gks1120), 2012-11-23
Supplement: supp_gks1120_nar-01609-d-2012-File007.pdf [file supp_gks1120_nar-01609-d-2012-File007.pdf]

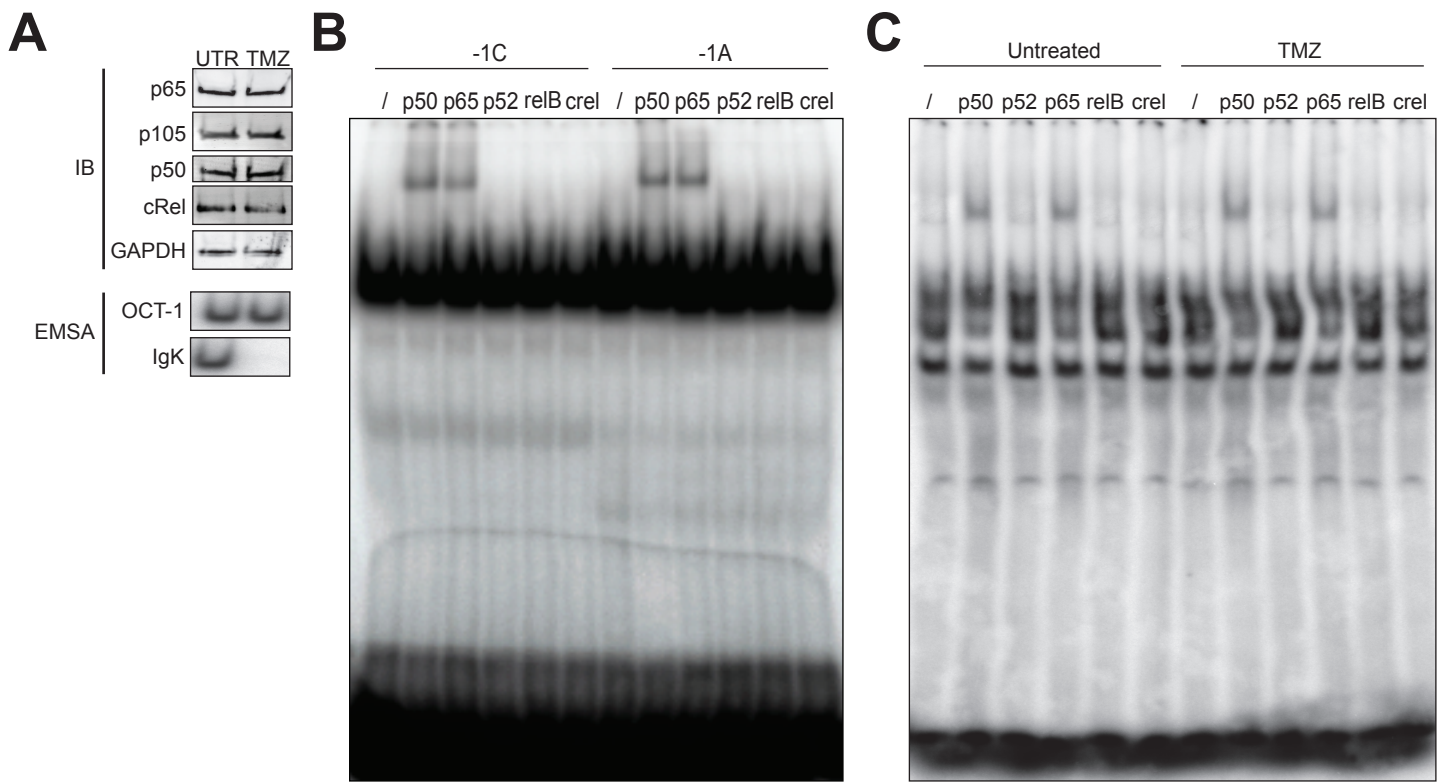

**D**

Murine  $\kappa$ B-site

|                       |   |   |   |   |   |   |   |   |   |   |
|-----------------------|---|---|---|---|---|---|---|---|---|---|
| Bcl-xL                | G | G | G | A | C | T | T | C | C | A |
| Fas                   | G | G | G | A | A | T | G | C | C | C |
|                       | G | G | G | T | T | T | C | C | C | C |
| *COX2                 | G | G | G | G | A | T | T | C | C | C |
| NOD2                  | G | G | G | A | A | T | T | T | C | C |
| CSF1                  | G | G | G | A | C | T | T | T | C | C |
| Gadd45 $\beta$        | G | G | G | A | C | T | C | T | C | C |
|                       | G | G | G | G | A | T | T | C | C | A |
| I $\kappa$ B $\alpha$ | G | G | A | A | A | T | T | C | C | C |
|                       | G | G | G | G | A | A | G | T | C | C |

Supplementary Figure 1. (A) U87 nuclear extracts, treated with 100  $\mu$ M TMZ or vehicle for 16 hours, were examined by immunoblot (IB) for the indicated NF- $\kappa$ B subunit and by EMSA for OCT-1 binding. Competition studies were used to demonstrate the specificity of the indicated band on EMSA (data not shown). (B and C) NF- $\kappa$ B EMSAs with the indicated probe in U87 cells. Supershift was performed with the antibodies shown. (B) Probes used include: GGGACTTTCC (-1C) or GGGGAATTTCC (-1A) probe. (C) -1A probe was used following treatment with vehicle or 100  $\mu$ M TMZ. (D) Murine  $\kappa$ B-sites. \* Cox2 promoter  $\kappa$ B-site.

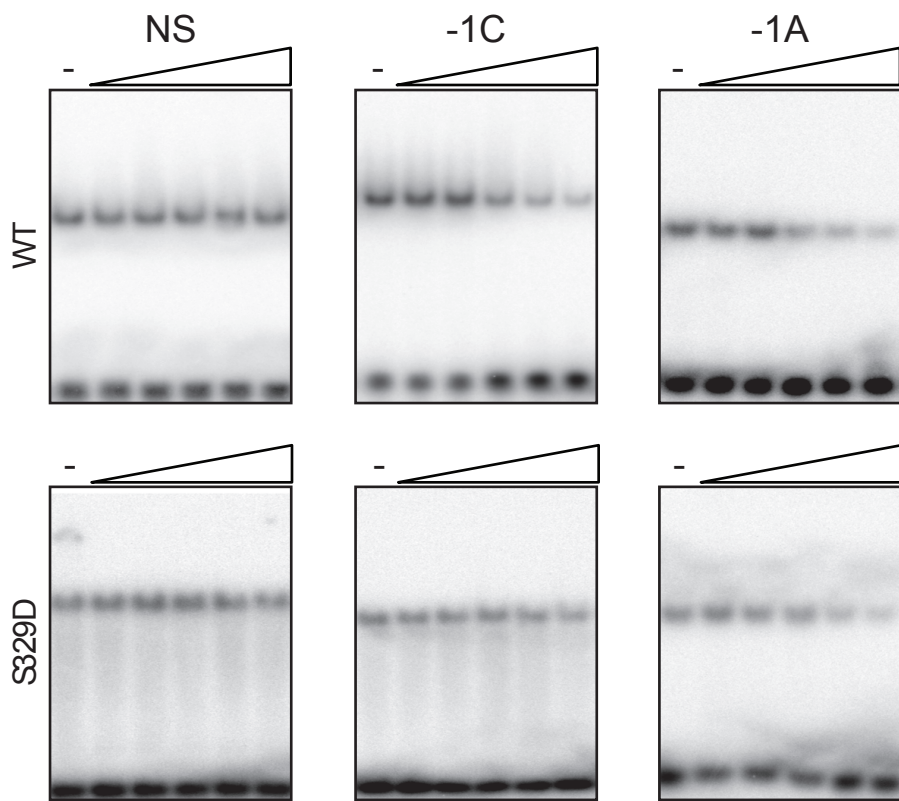

Supplementary Figure 2. Representative EMSA gels from competition assays using purified p50<sup>wt</sup> (upper) or p50<sup>S329D</sup> (lower). Radio-labeled -1A probe was used and increasing concentrations of unlabelled non-specific DNA (NS), -1C or -1A competitor DNA was added as described in methods.

**A**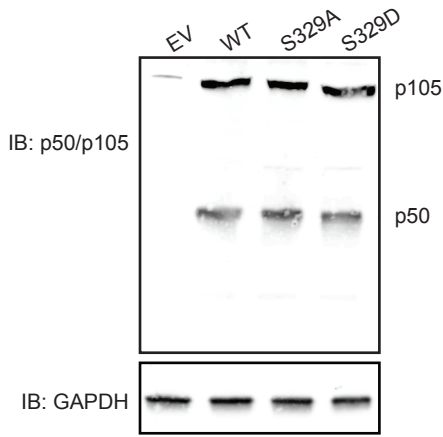**B**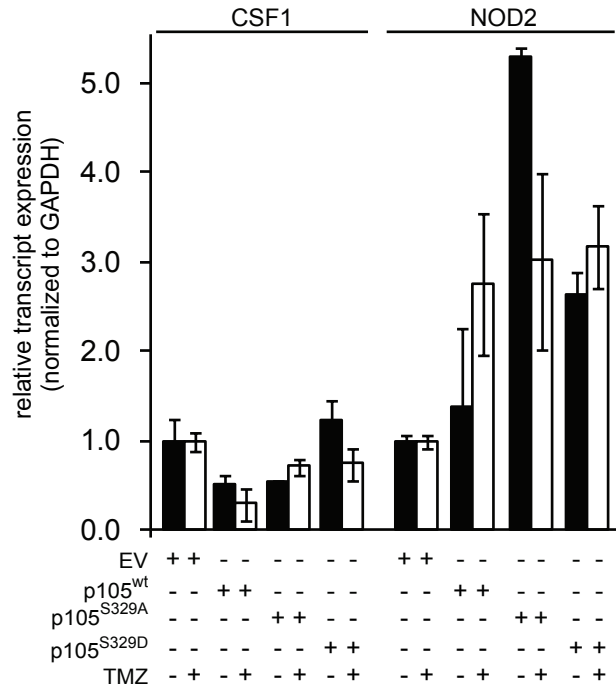

Supplementary Figure 3. Differential expression of CSF1 and NOD2 following DNA damage. (A) Immunoblot of p105<sup>-/-</sup> MEF cells transiently transfected with empty vector (EV), p105<sup>wt</sup>, p105<sup>S329A</sup>, or p105<sup>S329D</sup>. (B) qPCR analysis of CSF1 and NOD2 mRNA expression in p105<sup>-/-</sup> MEFs expressing empty vector (EV), p105<sup>wt</sup>, p105<sup>S329A</sup>, or p105<sup>S329D</sup> following 16 hour treatment with 100 μM TMZ (white bars) or vehicle (black bars). Data show mean values normalized to control ± SEM of triplicate samples from three experiments.

Supplementary Table 1. Sequence of  $\kappa$ B-site probes used for EMSA.

| <b><math>\kappa</math>B-site</b>    | <b>Sense Oligonucleotide Sequence</b> |
|-------------------------------------|---------------------------------------|
| p50 half-site variants              | GGGRNTTCC                             |
| p65 half-site variants              | GGGA (A/C) TYYCC                      |
| -1A $\kappa$ B-site                 | GGGAATTCC                             |
| -1C $\kappa$ B-site                 | GGGACTTCC                             |
| IgK                                 | GGGACTTCC                             |
| NOD2                                | GGGAATTCC                             |
| Bax                                 | GGGAATTCCA                            |
| IFN                                 | GGGAAATTCC                            |
| TNF                                 | GGGGCTTCC                             |
| H2B                                 | GGGGATTCCC                            |
| Bcl-xL                              | GGGACTGCCC                            |
| Fas                                 | GGGAATGCCC                            |
| TAP1/LMP2                           | GGGACTTCC                             |
| CSF1                                | GGGACTTCC                             |
| I $\kappa$ B $\alpha$               | GGAAATTCCC                            |
| Human Cox2                          | GGGACTACCC                            |
| Mouse Cox2 promoter $\kappa$ B-site | GGGGATTCCC                            |
| Mouse Cox2 intronic $\kappa$ B-site | GGGACTCCTC                            |
